# Supplementary material
Source: PubMed Central journal article supplement (PMC10169787)
Supplement: 41746_2023_818_MOESM1_ESM.pdf [file 41746_2023_818_MOESM1_ESM.pdf]

# Supplemental Information

Title: Telemedicine and the Environment: Life Cycle Environmental Emissions from In-Person and Virtual Clinic Visits

Supplemental Table 1: System inputs and unit processes used; including alternate scenarios for supplies. GLO=global, UP=unit process, U=unit, RoW=Rest of World, RER=Europe, CN=China, US=United States, WECC= Western Electricity Coordinating Council

| Transit Mode        | amount (2021 total) | unit      | Ecoinvent v3 UP                                                                                         | Source                                                                                                    |  |  |
|---------------------|---------------------|-----------|---------------------------------------------------------------------------------------------------------|-----------------------------------------------------------------------------------------------------------|--|--|
| Air travel          | 140921810.7         | people-km | Transport, passenger aircraft, short haul {GLO}  transport, passenger aircraft, short haul   Cut-off, U | Patient travel estimated from ZIP code of address vs. clinic; distances over 400km assumed as flight mode |  |  |
| Car travel          | 76428101.73         | km        | Transport, passenger car {RoW}  market for   Cut-off, U                                                 | Patient travel estimated from ZIP code of address vs. clinic; distances over 400km assumed as flight mode |  |  |
| Minimal Supply List | amount (per visit)  | unit      | Ecoinvent v3 UP                                                                                         | Source                                                                                                    |  |  |
| Surgical Mask       | 11.7                | g         | Polypropylene, granulate {GLO}  market for   Cut-off, U                                                 | Direct measurement; allocated over total use (1/10th the production and disposal)                         |  |  |
|                     | 0.24                | g         | Cellulose fibre {RoW}  market for cellulose fibre   Cut-off, U                                          | Direct measurement; allocated over total use (1/10th the production and disposal)                         |  |  |
|                     | 0.02925             | g         | Aluminium alloy, metal matrix composite {GLO}  market for   Cut-off, U                                  | Direct measurement; allocated over total use (1/10th the production and disposal)                         |  |  |
|                     | 0.02925             | g         | Polyurethane, flexible foam {RoW}  market for polyurethane, flexible foam   Cut-off, U                  | Direct measurement; allocated over total use (1/10th the production and disposal)                         |  |  |
|                     | 0.01                | kWh       | Electricity, high voltage {CN}  market group for   Cut-off, U                                           | Estimate; allocated over total use (1/10th the production and disposal)                                   |  |  |
| Hand Sanitizer      | 2.55                | g         | Benzyl alcohol {RER}  production   Cut-off, U                                                           | Estimate                                                                                                  |  |  |
| Table Cover         | 31.99347            | g         | Tissue paper {RER}  production   Cut-off, U                                                             | Estimate                                                                                                  |  |  |
| Sanitary Wipe       | 0.0212              | g         | Ammonium chloride (GLO) market for/cut-off, U                                                           | Duffy, et al                                                                                              |  |  |

|                                                               |                           |             |                                                                                                                                |                                                                                          |                              |                                     |
|---------------------------------------------------------------|---------------------------|-------------|--------------------------------------------------------------------------------------------------------------------------------|------------------------------------------------------------------------------------------|------------------------------|-------------------------------------|
|                                                               | 2.3                       | g           | Isopropanol {RoW}  market for isopropanol   Cut-off, U                                                                         | Duffy, et al                                                                             |                              |                                     |
|                                                               | 1                         | g           | Fibre, cotton (GLO) market for/Cut-off U                                                                                       | Duffy, et al                                                                             |                              |                                     |
| <b>Minimal Supply List - Transportation</b>                   | <b>amount (per visit)</b> | <b>unit</b> | <b>Ecoinvent v3 UP</b>                                                                                                         | <b>Source</b>                                                                            | <b>Assumed Distance (km)</b> | <b>Data Sources</b>                 |
| Shipping (from China)                                         | 0.117213                  | tkm         | Transport, freight, sea, container ship {GLO}  market for transport, freight, sea, container ship   Cut-off, U                 | Estimate                                                                                 | 3000                         | Estimates/assumptions - Google maps |
|                                                               | 0.00156284                | tkm         | Transport, freight, lorry >32 metric ton, euro4 {RoW}  market for transport, freight, lorry >32 metric ton, EURO4   Cut-off, U | Estimate                                                                                 | 40                           | Estimates/assumptions - Google maps |
| Waste transit                                                 | 0.00156284                | tkm         | Municipal waste collection service by 21 metric ton lorry {GLO}  market for   Cut-off, U                                       | Estimate                                                                                 | 40                           | Estimates/assumptions - Google maps |
| Waste scenario                                                | 39.071                    | g           | Municipal solid waste (waste scenario) {US}  Treatment of waste   Cut-off, U                                                   | Calculated from measured data                                                            |                              |                                     |
| <b>Intensive Supply List (above, 1 mask per visit, PLUS:)</b> | <b>amount (per visit)</b> | <b>unit</b> | <b>Ecoinvent v3 UP</b>                                                                                                         | <b>Source</b>                                                                            |                              |                                     |
| Exam gloves (2)                                               | 9.6                       | g           | Polybutadiene {RER}  production   Cut-off, U                                                                                   | Primary - weighed item; assumed material type                                            |                              |                                     |
| Gown                                                          | 110                       | g           | Polypropylene, granulate {RER}  production   Cut-off, U + Electricity, high voltage {CN}  market group for   Cut-off, U        | Primary - weighed item; assumed material type; energy from literature (secondary source) |                              |                                     |
|                                                               | 0.5                       | kWh         | Electricity, high voltage {CN}  market group for   Cut-off, U                                                                  | Estimate                                                                                 |                              |                                     |

|                                               |                           |             |                                                                                                                                                                                                                                                                                            |                                                                                          |                              |                                     |
|-----------------------------------------------|---------------------------|-------------|--------------------------------------------------------------------------------------------------------------------------------------------------------------------------------------------------------------------------------------------------------------------------------------------|------------------------------------------------------------------------------------------|------------------------------|-------------------------------------|
| Patient Gown                                  | 110                       | g           | Polypropylene, granulate {RER}  production   Cut-off, U + Cellulose fibre {RoW}  market for cellulose fibre   Cut-off, U + Aluminium alloy, metal matrix composite {GLO}  market for   Cut-off, U + Polyurethane, flexible foam {RoW}  market for polyurethane, flexible foam   Cut-off, U | Primary - weighed item; assumed material type; energy from literature (secondary source) |                              |                                     |
|                                               | 0.5                       | kWh         | Electricity, high voltage {CN}  market group for   Cut-off, U                                                                                                                                                                                                                              | Estimate                                                                                 |                              |                                     |
| <b>Intensive Supply List - Transportation</b> | <b>amount (per visit)</b> | <b>unit</b> | <b>Ecoinvent v3 UP</b>                                                                                                                                                                                                                                                                     | <b>Source</b>                                                                            | <b>Assumed Distance (km)</b> | <b>Data Sources</b>                 |
| Shipping (from China)                         | 0.838413                  | tkm         | Transport, freight, sea, container ship {GLO}  market for transport, freight, sea, container ship   Cut-off, U                                                                                                                                                                             | Estimate                                                                                 | 3000                         | Estimates/assumptions - google maps |
|                                               | 0.01117884                | tkm         | Transport, freight, lorry >32 metric ton, euro4 {RoW}  market for transport, freight, lorry >32 metric ton, EURO4   Cut-off, U                                                                                                                                                             | Estimate                                                                                 | 40                           | Estimates/assumptions - google maps |
| Waste transit                                 | 0.01117884                | tkm         | Municipal waste collection service by 21 metric ton lorry {GLO}  market for   Cut-off, U                                                                                                                                                                                                   | Estimate                                                                                 | 40                           | Estimates/assumptions - google maps |
| Waste scenario                                | 279.471                   | g           | Municipal solid waste (waste scenario) {US}  Treatment of waste   Cut-off, U                                                                                                                                                                                                               | Calculated from measured data                                                            |                              |                                     |
| <b>HVAC Energy Use</b>                        | <b>amount (per min)</b>   | <b>unit</b> | <b>Ecoinvent v3 UP</b>                                                                                                                                                                                                                                                                     | <b>Source</b>                                                                            |                              |                                     |
| Natural gas, heating                          | 0.010331205               | MJ/min      | Heat, central or small-scale, natural gas {RoW}  market for heat, central or small-scale, natural gas   Cut-off, U                                                                                                                                                                         | Direct measurement; averaged across all measured facilities                              |                              |                                     |
| Electricity, all uses plus chilled water      | 0.00625289                | kWh/min     | Transport, passenger car {RoW}  market for   Cut-off, U                                                                                                                                                                                                                                    | Direct measurement; averaged across all measured facilities                              |                              |                                     |
| Steam from district heating                   | 0.011718687               | MJ/min      | Video, one minute, WECC grid                                                                                                                                                                                                                                                               | Direct measurement; averaged across all measured facilities                              |                              |                                     |



|                            |                                |                     |           |             |            |            |                  |                  |
|----------------------------|--------------------------------|---------------------|-----------|-------------|------------|------------|------------------|------------------|
| Transportation:<br>All car | 2021 In-person, all car        | 1,289,433           | 1,289,433 | 136,789,932 | -          | 33,309,070 |                  |                  |
|                            | 2021 Phone (IF all car)        | 59,635              | 59,635    | 5,630,794   | -          | 1,638,655  |                  |                  |
|                            | 2021 Video (IF all car)        | 612,700             | 612,700   | 74,929,186  | -          | 19,494,010 |                  |                  |
| Energy: WECC<br>+ solar    | 2021 In-person, air            | 39,213              | 39,213    | 0           | 93,908,607 | 882,760    |                  |                  |
|                            | 2021 phone, air (IF in person) | 1,396               | 1,396     | 0           | 3,070,530  | 43,025     |                  |                  |
|                            | 2021 video, air (IF in person) | 21,895              | 21,895    | 0           | 43,942,674 | 764,470    |                  |                  |
|                            | 2021 In-person, car            | 1,250,220           | 1,250,220 | 42,881,325  | 0          | 32,426,310 |                  |                  |
|                            | 2021 phone, car (IF in person) | 58,239              | 58,239    | 2,560,264   | 0          | 1,595,630  |                  |                  |
|                            | 2021 video, car (IF in person) | 590,805             | 590,805   | 30,986,513  | -          | 18,729,540 | <b>phone min</b> | <b>video min</b> |
|                            | 2021 - phone                   | -                   | -         | -           | -          | -          | 1,638,655        | -                |
|                            | 2021 - video                   | -                   | -         | -           | -          | -          | -                | 19,494,010       |
|                            | Energy: US Average             | 2021 In-person, air | 39,213    | 39,213      | 0          | 93,908,607 | 882,760          |                  |
|                            | 2021 phone, air (IF in person) | 1,396               | 1,396     | 0           | 3,070,530  | 43,025     |                  |                  |
|                            | 2021 video, air (IF in person) | 21,895              | 21,895    | 0           | 43,942,674 | 764,470    |                  |                  |
|                            | 2021 In-person, car            | 1,250,220           | 1,250,220 | 42,881,325  | 0          | 32,426,310 |                  |                  |
|                            | 2021 phone, car (IF in person) | 58,239              | 58,239    | 2,560,264   | 0          | 1,595,630  |                  |                  |

|                          |                                |           |           |            |            |            |           |            |
|--------------------------|--------------------------------|-----------|-----------|------------|------------|------------|-----------|------------|
|                          | 2021 video, car (IF in person) | 590,805   | 590,805   | 30,986,513 | -          | 18,729,540 | phone min | video min  |
|                          | 2021 - phone                   | -         | -         | -          | -          | -          | 1,638,655 | -          |
|                          | 2021 - video                   | -         | -         | -          | -          | -          | -         | 19,494,010 |
| Supplies: intensive list | 2021 In-person, air            | 39,213    | 39,213    | -          | 93,908,607 | 882,760    |           |            |
|                          | 2021 In-person, car            | 1,250,220 | 1,250,220 | 42,881,325 | -          | 32,426,310 |           |            |

Supplemental Table 3: Model inputs and assumptions of clinic energy consumption and surface area; Base case and min/max scenario modeling

| Measured Data related to Energy Consumption of in-Person Systems | Electricity (kWh/sf/min) | Natural Gas (MJ/sf/min) | Chilled water (kWh/sf/min) | Steam (MJ/sf/min) | Room size (sf), assumed |
|------------------------------------------------------------------|--------------------------|-------------------------|----------------------------|-------------------|-------------------------|
| <i>Base: (Campus Average)</i>                                    | 5.47652E-05              | 0.000103312             | 7.76368E-06                | 0.000117187       | 100                     |
| <i>Maximum</i>                                                   | 6.88927E-05              | 0.000574177             | 1.24724E-05                | 0.000214128       | 225                     |
| <i>Minimum</i>                                                   | 2.04401E-05              | 0                       | 0                          | 0                 | 64                      |

Supplemental Table 4: Per-patient Greenhouse Gas emissions at SHC in 2021 by Department. SMP = Stanford Medical Partners, GI = Gastrointestinal

| Department          | kgCO2e/patient (in person only) | kgCO2e/patient (virtual only) | GHG reductions |
|---------------------|---------------------------------|-------------------------------|----------------|
| Acute Care Surgery  | 23.19                           | 0.0233                        | 99.90%         |
| Cancer              | 25.80                           | 0.0344                        | 99.87%         |
| Cardiovascular      | 29.99                           | 0.0513                        | 99.83%         |
| Dermatology         | 16.92                           | 0.0226                        | 99.87%         |
| GI/GI Surgery       | 25.37                           | 0.0465                        | 99.82%         |
| Gynecology          | 19.91                           | 0.0479                        | 99.76%         |
| Medical Specialties | 23.39                           | 0.0492                        | 99.79%         |
| Neurosciences       | 37.72                           | 0.0501                        | 99.87%         |
| Ophthalmology       | 20.15                           | 0.0252                        | 99.87%         |

|                               |       |        |        |
|-------------------------------|-------|--------|--------|
| Orthopedics                   | 63.85 | 0.0258 | 99.96% |
| Otolaryngology                | 25.93 | 0.0429 | 99.83% |
| Pain management               | 23.83 | 0.0702 | 99.71% |
| Plastic Surgery               | 24.56 | 0.0292 | 99.88% |
| Primary Care                  | 11.54 | 0.0423 | 99.63% |
| Psychiatry                    | 35.91 | 0.0751 | 99.79% |
| Pulmonary & Critical Care     | 30.30 | 0.0478 | 99.84% |
| SMP Oncology                  | 9.18  | 0.0276 | 99.70% |
| SMP Primary Care & Pediatrics | 7.33  | 0.0311 | 99.58% |
| SMP Specialty Care            | 8.90  | 0.0317 | 99.64% |
| Urology                       | 18.70 | 0.0390 | 99.79% |
| <b>TOTAL</b>                  | 20.04 | 0.0430 | 99.79% |

Supplemental Table 5: Life Cycle Results for 2021 data (cumulative); WECC= Western Electricity Coordinating Council

| Impact category   | Unit         | Phone, one minute, WECC grid | Video, one minute, WECC grid | In person, Car | In person, Air | TOTAL (2021 SHC Visits) |
|-------------------|--------------|------------------------------|------------------------------|----------------|----------------|-------------------------|
| Ozone depletion   | kg CFC-11 eq | 9.20952E-05                  | 0.001844036                  | 2.849211375    | 2.602209842    | 5.453357348             |
| Global warming    | kg CO2 eq    | 1,332.07                     | 27,568.70                    | 14,426,785.18  | 11,411,217.10  | 25,866,903              |
| Smog              | kg O3 eq     | 59.16748557                  | 1110.417111                  | 834839.8399    | 1228089.108    | 2064098.532             |
| Acidification     | kg SO2 eq    | 4.855870369                  | 88.11502952                  | 51025.64683    | 50095.49919    | 101214.1169             |
| Eutrophication    | kg N eq      | 10.85541512                  | 220.3741332                  | 25299.53295    | 10125.96       | 35656.72249             |
| Carcinogenics     | CTUh         | 0.000190171                  | 0.003448333                  | 1.843533223    | 0.14201771     | 1.989189437             |
| Non carcinogenics | CTUh         | 0.000898494                  | 0.015376862                  | 3.59232697     | 1.464095831    | 5.072698157             |

|                       |             |             |             |             |             |             |
|-----------------------|-------------|-------------|-------------|-------------|-------------|-------------|
| Respiratory effects   | kg PM2.5 eq | 3.341351662 | 74.15252071 | 8584.59233  | 3352.933977 | 12015.02018 |
| Ecotoxicity           | CTUe        | 86675.62949 | 1491669.186 | 470255246   | 24820556.14 | 496654147   |
| Fossil fuel depletion | MJ surplus  | 1333.309503 | 27900.48216 | 26547185.19 | 23353168.31 | 49929587.29 |

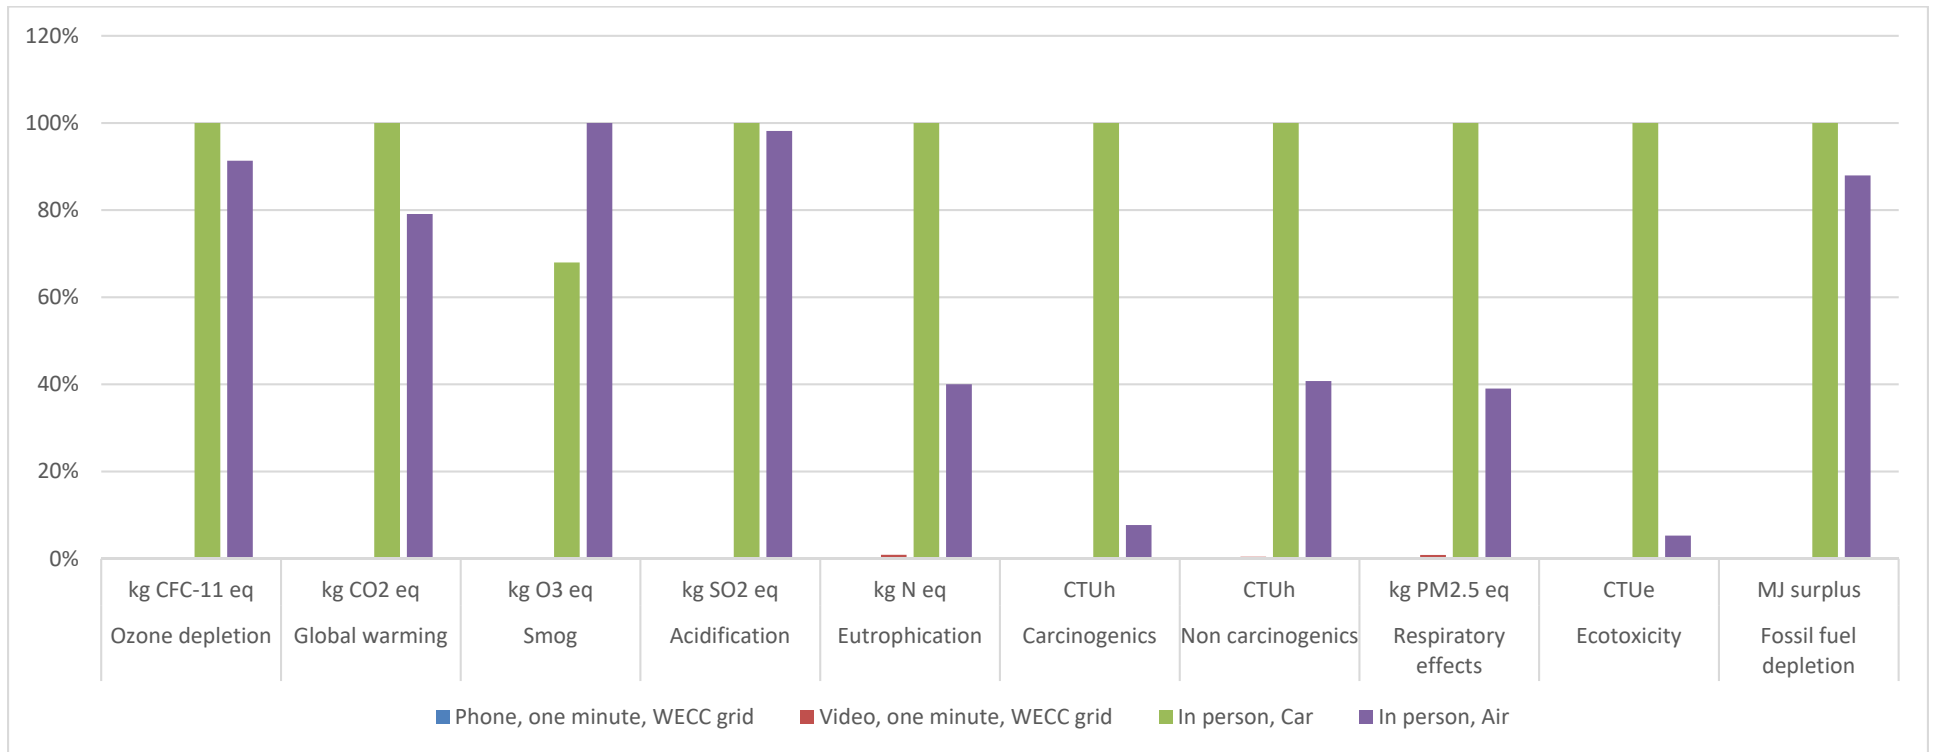

Supplemental Figure 1: Life Cycle Results for Stanford Health Care Clinic Visits; normalized to largest value in each impact category

Supplemental Table 6: Life Cycle Results for 2021 car travel visits (cumulative); WECC= Western Electricity Coordinating Council



| <b>Impact category</b> | <b>In-person visit (minimal supplies)</b> | <b>Stanford medical trash (minimal supplies)</b> | <b>Transport, passenger car {RoW}  market for   Cut-off, U</b> | <b>One minute in-person Visit, WECC grid</b> |
|------------------------|-------------------------------------------|--------------------------------------------------|----------------------------------------------------------------|----------------------------------------------|
| Ozone depletion        | 0.0101901                                 | 0.000727                                         | 2.826965627                                                    | 0.011328813                                  |
| Global warming         | 91,731.47                                 | 7,793.13                                         | 14,203,972.82                                                  | 123,287.77                                   |
| Smog                   | 5298.1457                                 | 929.0306                                         | 825137.4348                                                    | 3475.228832                                  |
| Acidification          | 472.98291                                 | 31.49692                                         | 50276.49885                                                    | 244.6681525                                  |
| Eutrophication         | 664.04068                                 | 53.41693                                         | 23945.3473                                                     | 636.7280307                                  |
| Carcinogenics          | 0.0080544                                 | 0.001471                                         | 1.825262985                                                    | 0.008744543                                  |
| Non carcinogenics      | 0.1050632                                 | 0.009873                                         | 3.4486644                                                      | 0.028725985                                  |
| Respiratory effects    | 51.615996                                 | 2.710798                                         | 8282.304483                                                    | 247.9610527                                  |
| Ecotoxicity            | 1389622.3                                 | 790903.1                                         | 465241521.7                                                    | 2833198.922                                  |
| Fossil fuel depletion  | 174593.65                                 | 6126.335                                         | 26172251.35                                                    | 194213.8522                                  |

Supplemental Table 7: Life Cycle Results for 2021 air travel visits (cumulative); WECC= Western Electricity Coordinating Council

| Impact category       | In-person visit (minimal supplies) | Stanford medical trash (minimal supplies) | Transport, passenger aircraft, short haul {GLO}  market for transport, passenger aircraft, short haul   Cut-off, U | One minute in-person Visit, WECC grid |
|-----------------------|------------------------------------|-------------------------------------------|--------------------------------------------------------------------------------------------------------------------|---------------------------------------|
| Ozone depletion       | 0.00032                            | 2.28E-05                                  | 2.601559023                                                                                                        | 0.000308                              |
| Global warming        | 2,877.15                           | 244.43                                    | 11,404,739.19                                                                                                      | 3,356.33                              |
| Smog                  | 166.1757                           | 29.13893                                  | 1227799.185                                                                                                        | 94.60814                              |
| Acidification         | 14.83505                           | 0.987897                                  | 50073.0155                                                                                                         | 6.660741                              |
| Eutrophication        | 20.82756                           | 1.675416                                  | 10086.12301                                                                                                        | 17.33401                              |
| Carcinogenics         | 0.000253                           | 4.61E-05                                  | 0.14148088                                                                                                         | 0.000238                              |
| Non carcinogenics     | 0.003295                           | 0.00031                                   | 1.459708835                                                                                                        | 0.000782                              |
| Respiratory effects   | 1.61893                            | 0.085024                                  | 3344.479638                                                                                                        | 6.750386                              |
| Ecotoxicity           | 43585.34                           | 24806.58                                  | 24675034.43                                                                                                        | 77129.8                               |
| Fossil fuel depletion | 5476.109                           | 192.1518                                  | 23342212.86                                                                                                        | 5287.195                              |

Supplemental Table 8: Detailed results for GHG emissions in sensitivity analyses (SHC 2021 data); WECC= Western Electricity Coordinating Council

| <b>GHG Results, Energy Sources</b> | <b>baseline (WECC)</b> | <b>WECC+solar</b> | <b>US avg</b> | <b>% difference from baseline</b> |        |       |
|------------------------------------|------------------------|-------------------|---------------|-----------------------------------|--------|-------|
| In-person visits (car)             | 14,426,785             | 14,355,862        | 14447096.7    | 0.0%                              | -0.5%  | 0.1%  |
| In-person visits (air)             | 11,411,217             | 11,409,286        | 11411770.09   | 0.0%                              | 0.0%   | 0.0%  |
| Phone visits                       | 1,332.07               | 507.63            | 1,568.18      | 0.0%                              | -61.9% | 17.7% |
| Video visits                       | 27,568.70              | 7,884.88          | 33,205.86     | 0.0%                              | -71.4% | 20.4% |
| In-person TOTAL                    | 25,838,002.38          | 25,765,148.15     | 25,858,866.78 | 0.0%                              | -0.3%  | 0.1%  |
| Virtual TOTAL                      | 28,900.77              | 8,392.52          | 34,774.04     | 0.0%                              | -71.0% | 20.3% |

|                                                                            |                             |                     |                                   |                                   |            |      |
|----------------------------------------------------------------------------|-----------------------------|---------------------|-----------------------------------|-----------------------------------|------------|------|
| "Savings" of virtual system over in-person (if virtual was done in person) | 16,926,497                  | 16,900,783.50       | 16,933,860.99                     | 0.0%                              | -0.2%      | 0.0% |
| If in-person was all cars                                                  | 45,539,469                  |                     |                                   | 76.2%                             |            |      |
| <b>GHG Results, Energy Intensity (HVAC system)</b>                         | <b>Min energy intensity</b> | <b>Baseline</b>     | <b>Max energy intensity</b>       | <b>% difference from baseline</b> |            |      |
| In-person visits (car)                                                     | 14,320,619                  | 14,426,785          | 14,793,903                        | -0.7%                             | 0.0%       | 2.5% |
| In-person visits (air)                                                     | 11,408,327                  | 11,411,217          | 11,421,211                        | 0.0%                              | 0.0%       | 0.1% |
| Phone visits                                                               | 1,332.07                    | 1,332               | 1,332.07                          | 0.0%                              | 0.0%       | 0.0% |
| Video visits                                                               | 27,568.70                   | 27,569              | 27,568.70                         | 0.0%                              | 0.0%       | 0.0% |
| In-person TOTAL                                                            | 25,728,945.90               | 25,838,002.38       | 26,215,114.50                     | -0.4%                             | 0.0%       | 1.5% |
| Virtual TOTAL                                                              | 28,900.77                   | 28,900.77           | 28,900.77                         | 0.0%                              | 0.0%       | 0.0% |
| "Savings" of virtual system over in-person (if virtual was done in person) | 16,857,307                  | 16,926,497          | 17,165,753                        | -0.4%                             | 0.0%       | 1.4% |
| <b>GHG Results, Intensive Supply List</b>                                  | <b>Baseline</b>             | <b>Max supplies</b> | <b>% difference from baseline</b> |                                   |            |      |
| In-person visits (car)                                                     | 14,355,862                  | 14,618,550          | 0.0%                              | 1.8%                              |            |      |
| In-person visits (air)                                                     | 11,411,217                  | 11,417,148          | 0.0%                              | 0.1%                              |            |      |
| Phone visits                                                               | 1,332                       | 1,332.07            | 0.0%                              | 0.0%                              |            |      |
| Video visits                                                               | 27,569                      | 27,568.70           | 0.0%                              | 0.0%                              |            |      |
| In-person TOTAL                                                            | 25,767,078.94               | 26,035,697.61       | 0.0%                              | 1.0%                              | 268,618.66 |      |
| Virtual TOTAL                                                              | 28,901                      | 28,900.77           | 0.0%                              | 0.0%                              |            |      |

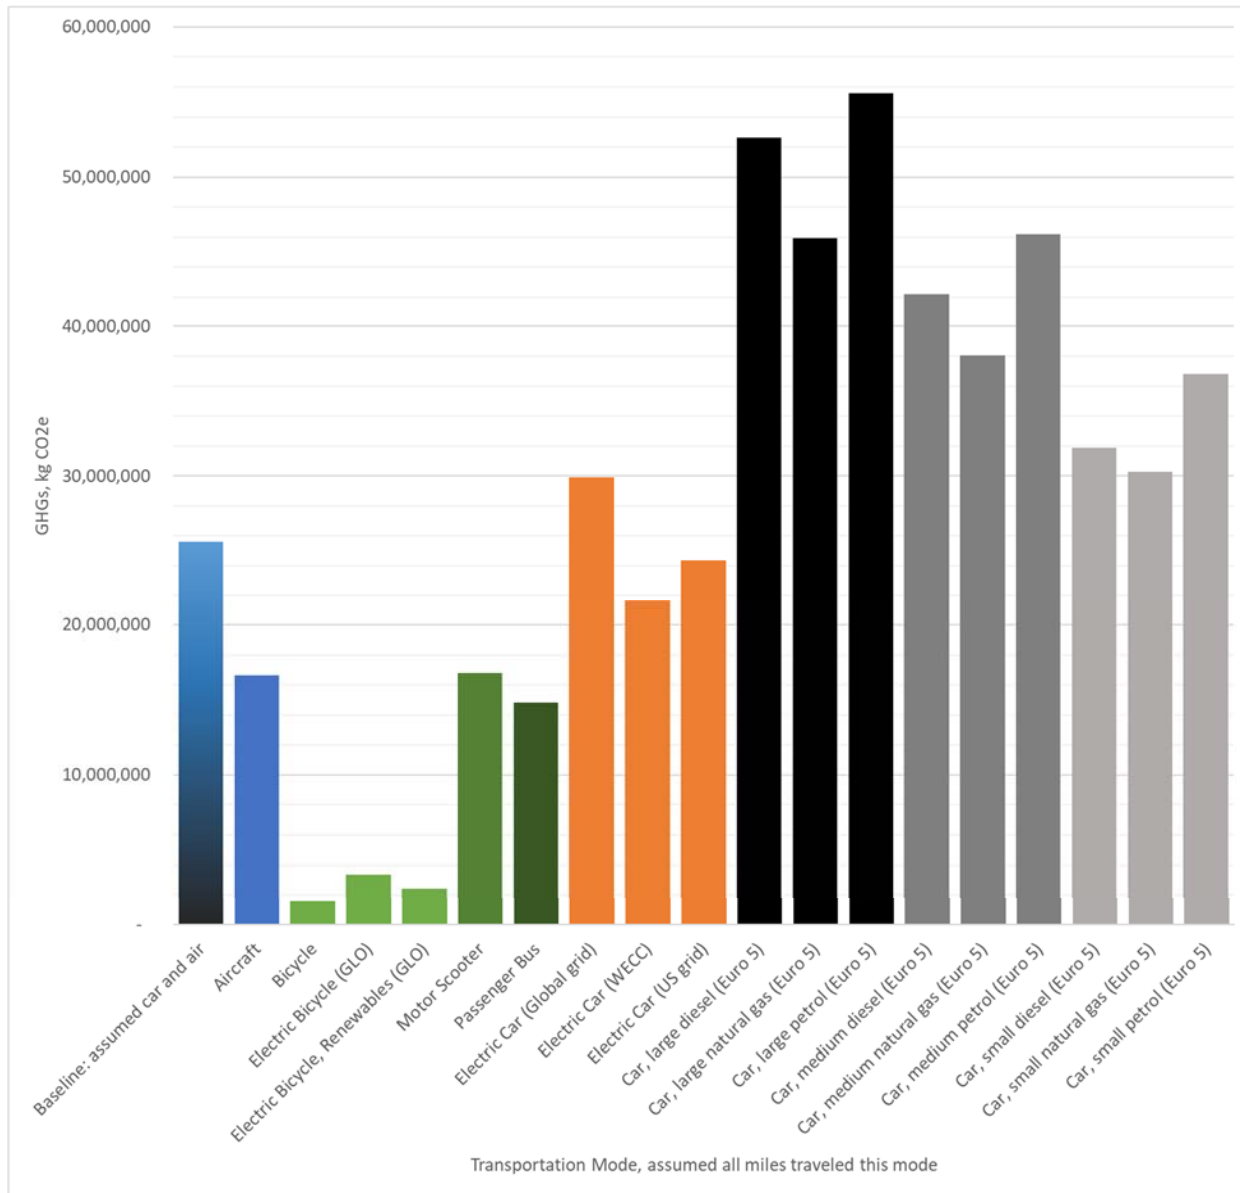

Figure 2: Variation in estimated emissions from patient travel modes, showing only transportation emissions for in-person visits in 2021. GLO=global energy mix, WECC= Western Electricity Coordinating Council or California’s grid mix, US avg= United States average grid mix, Euro 5=passenger vehicles conforming to European emissions standards from 2008 (the most recent passenger vehicles available in the Ecoinvent database)

## List of Ecoinvent v3.8 unit processes used for Transportation Mode sensitivity analyses:

We assumed one person traveling per visit.

- 1 personkm Transport, passenger, bicycle {GLO}| market for | Cut-off, U (of project Ecoinvent 3 - allocation, cut-off by classification - unit)
- 1 personkm Transport, passenger, electric bicycle {GLO}| market for | Cut-off, U (of project Ecoinvent 3 - allocation, cut-off by classification - unit)
- 1 personkm Transport, passenger, electric bicycle, electricity from renewable energy products {GLO}| market for transport, passenger, electric bicycle, electricity from renewable energy products | Cut-off, U (of project Ecoinvent 3 - allocation, cut-off by classification - unit)
- 1 personkm Transport, passenger, motor scooter {GLO}| market for | Cut-off, U (of project Ecoinvent 3 - allocation, cut-off by classification - unit)
- 1 personkm Transport, regular bus {GLO}| market for | Cut-off, U (of project Ecoinvent 3 - allocation, cut-off by classification - unit)
- 1 km Transport, passenger car, electric {GLO}| market for | Cut-off, U (of project Ecoinvent 3 - allocation, cut-off by classification - unit)
- 1 km Transport, passenger car, large size, diesel, EURO 5 {GLO}| market for | Cut-off, U (of project Ecoinvent 3 - allocation, cut-off by classification - unit)
- 1 km Transport, passenger car, large size, natural gas, EURO 5 {GLO}| market for | Cut-off, U (of project Ecoinvent 3 - allocation, cut-off by classification - unit)
- 1 km Transport, passenger car, large size, petrol, EURO 5 {GLO}| market for | Cut-off, U (of project Ecoinvent 3 - allocation, cut-off by classification - unit)
- 1 km Transport, passenger car, medium size, diesel, EURO 5 {GLO}| market for | Cut-off, U (of project Ecoinvent 3 - allocation, cut-off by classification - unit)
- 1 km Transport, passenger car, medium size, natural gas, EURO 5 {GLO}| market for | Cut-off, U (of project Ecoinvent 3 - allocation, cut-off by classification - unit)
- 1 km Transport, passenger car, medium size, petrol, EURO 5 {GLO}| market for | Cut-off, U (of project Ecoinvent 3 - allocation, cut-off by classification - unit)
- 1 km Transport, passenger car, small size, diesel, EURO 5 {GLO}| market for | Cut-off, U (of project Ecoinvent 3 - allocation, cut-off by classification - unit)
- 1 km Transport, passenger car, small size, natural gas, EURO 5 {GLO}| market for | Cut-off, U (of project Ecoinvent 3 - allocation, cut-off by classification - unit)
- 1 km Transport, passenger car, small size, petrol, EURO 5 {GLO}| market for | Cut-off, U (of project Ecoinvent 3 - allocation, cut-off by classification - unit)
- 1 km Transport, passenger car, electric {WECC}| market for | Cut-off, U (of project Stanford Virtual Visits)
- 1 km Transport, passenger car, electric {US}| market for | Cut-off, U (of project Stanford Virtual Visits)
